# Supplementary material for: Firing the Sting: Chemically Induced Discharge of Cnidae Reveals Novel Proteins and Peptides from Box Jellyfish (Chironex fleckeri) Venom
Source: MDPI journal article supplement (doi:10.3390/toxins7030936), 2015-03-18
Supplement: s1 [file s1]

## Supplementary Information

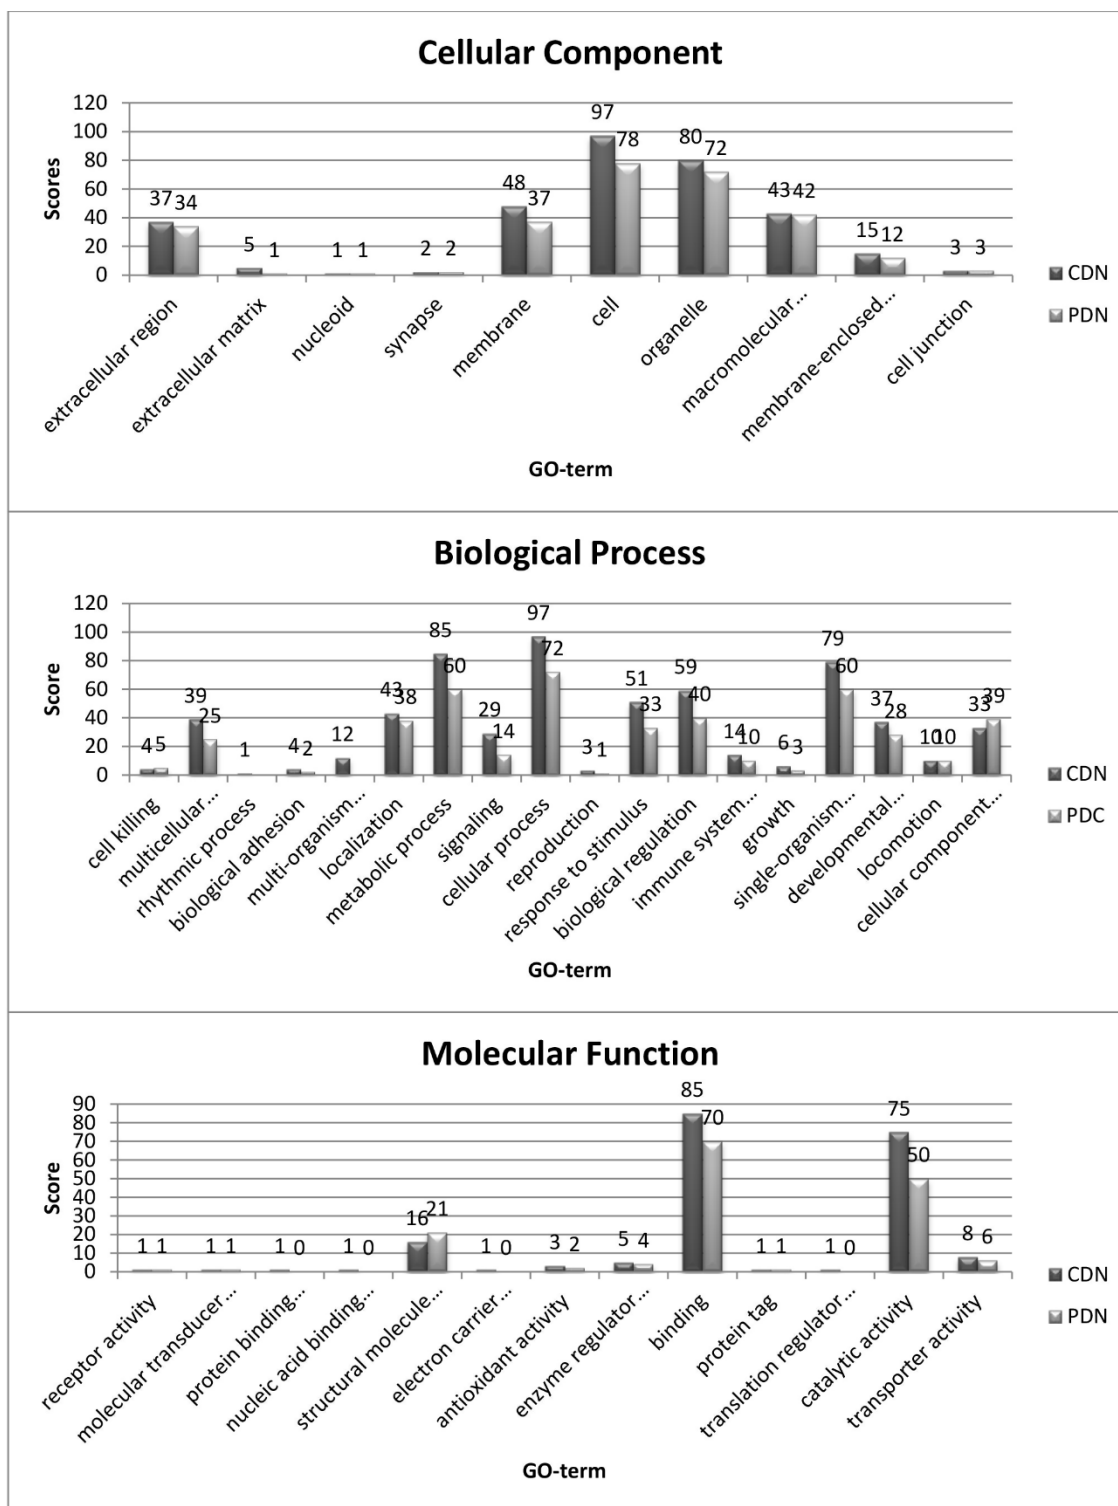

**Figure S1.** The relative abundance of proteins present in chemically discharged nematocysts (CDN; dark grey bars) and pressure disrupted nematocysts (PDN; light grey bars) based on GO-term classification of the assembled and annotated *C. fleckeri* transcriptome.
